# Supplementary material
Source: PubMed Central journal article supplement (PMC6357769)
Supplement: NIHMS888848-supplement-1.pdf [file NIHMS888848-supplement-1.pdf]

# Supplemental Figure S1

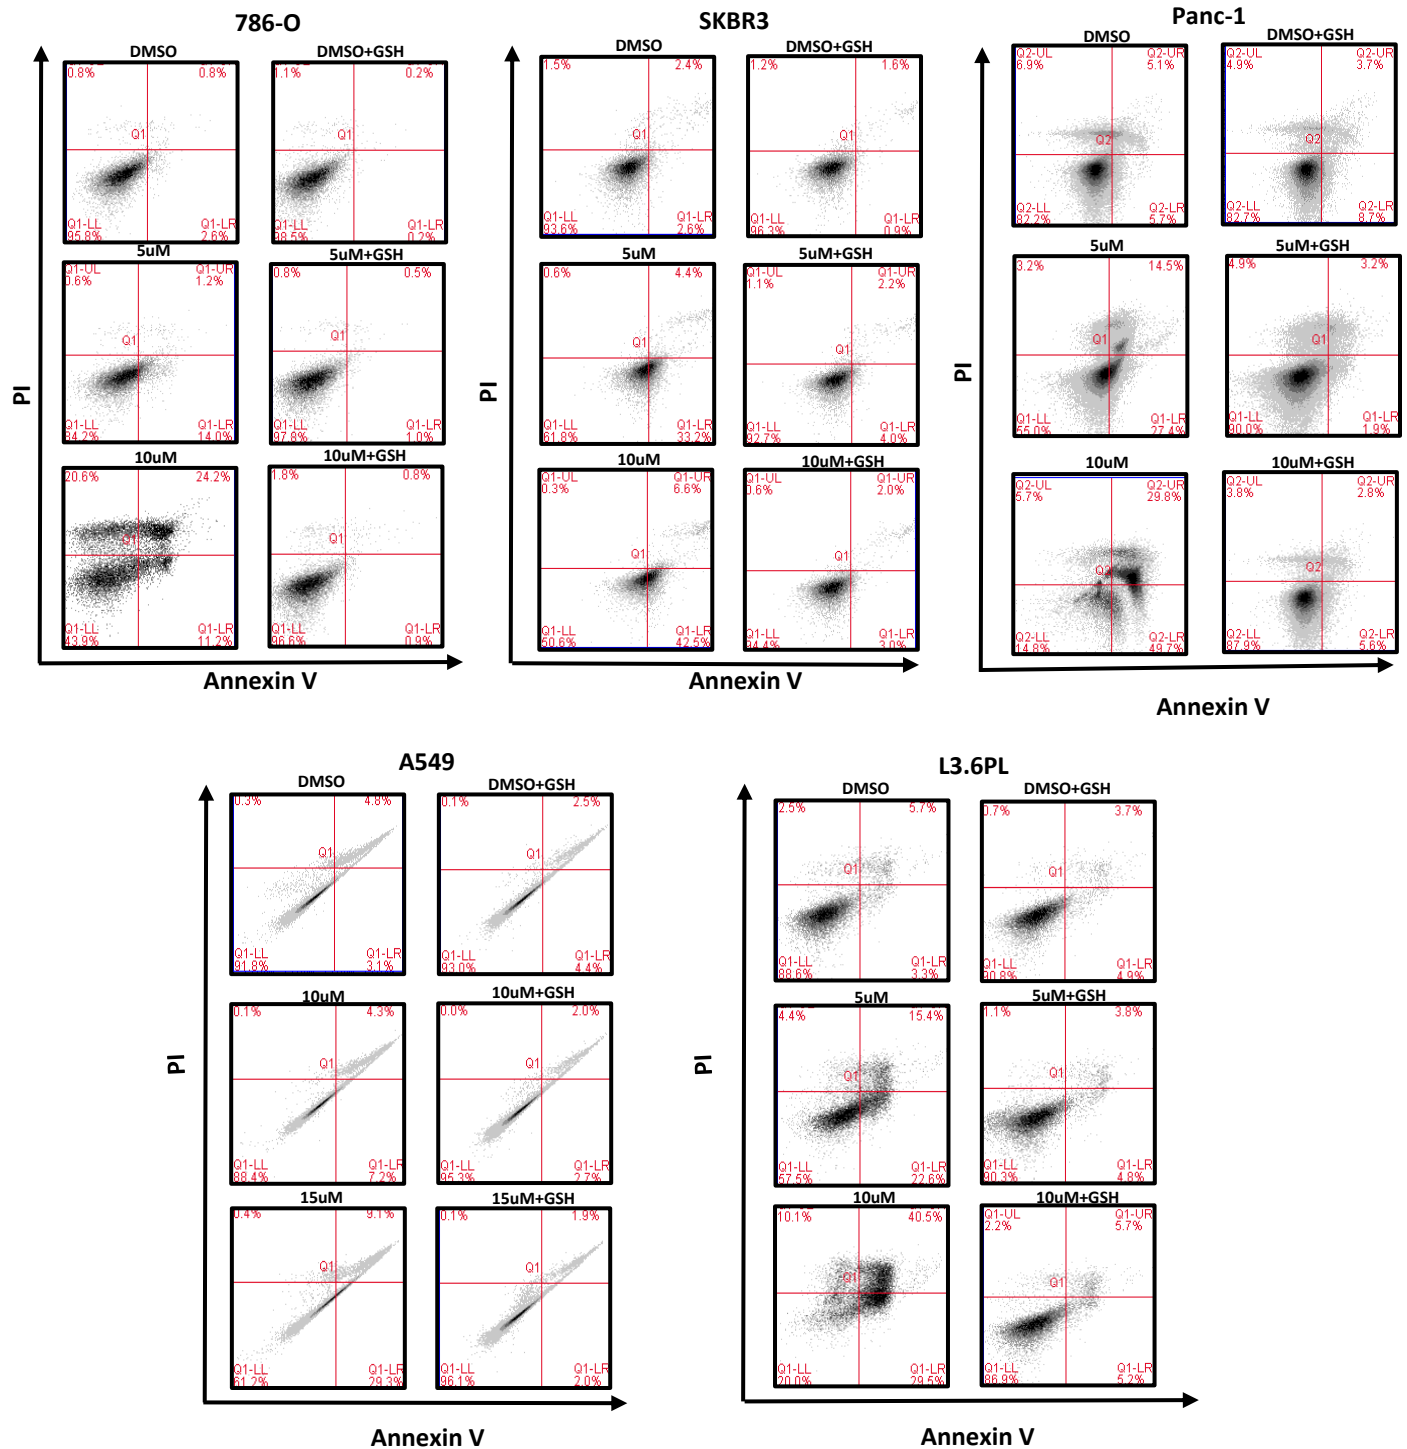

**Supplemental Figure S1.** The cancer cell lines were treated as outlined in Figure 3 and Annexin V staining was determined as described in the Materials and Methods.
