# Supplementary material
Source: PubMed Central journal article supplement (PMC6357769)
Supplement: NIHMS888848-supplement-2.pdf [file NIHMS888848-supplement-2.pdf]

## Supplemental Figure S2

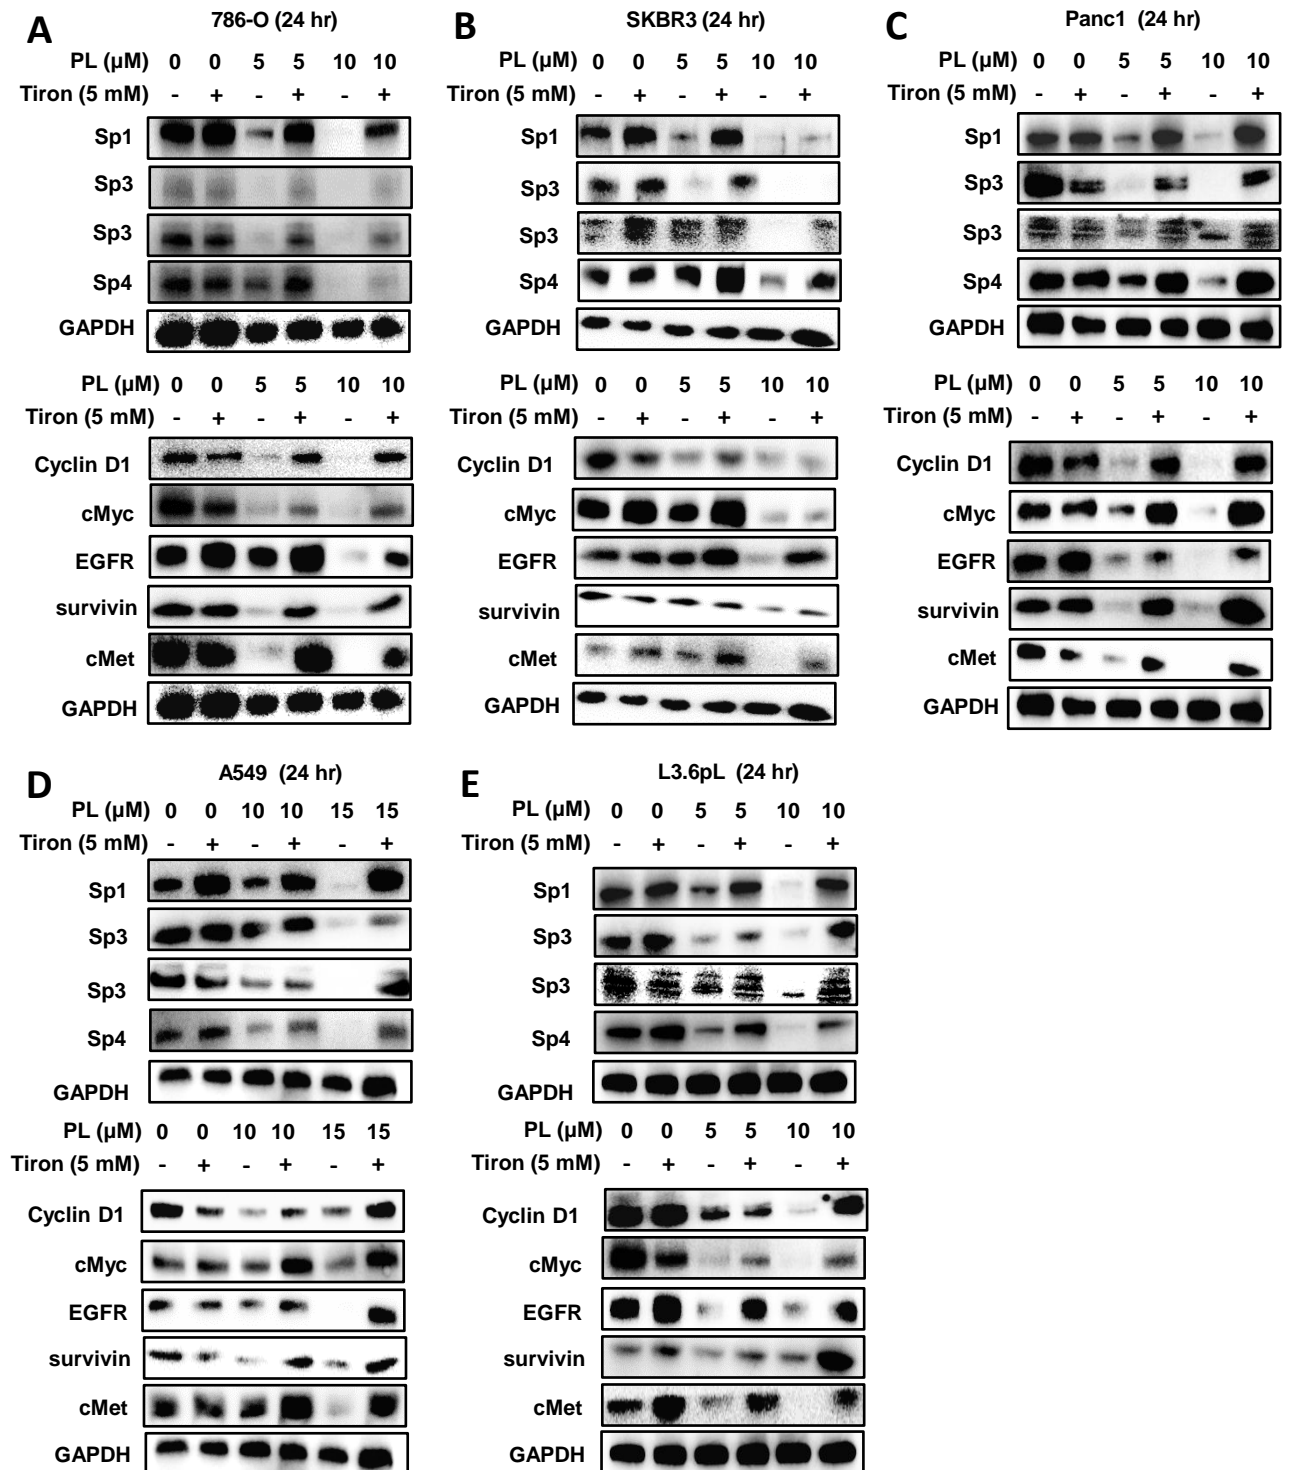

**Supplemental Figure S2.** Piperlongumine downregulates Sp1, Sp3, Sp4 and Sp-regulated genes: effects of Tiron. 786-O (A), SKBR3 (B), Panc1 (C), A549 (D), and L3.6pL (E) cells were treated with 5 mM GSH or different concentrations of piperlongumine alone and in combination for 24 hr, and whole cell lysates were analyzed by western blots. Effects on Sp proteins and Sp-regulated genes and PARP cleavage (Fig. 3) were all obtained in the same experiment and have the same GAPDH loading control. Similar results were observed in duplicate experiments.
