# Supplementary material
Source: PubMed Central journal article supplement (PMC6357769)
Supplement: NIHMS888848-supplement-3.pdf [file NIHMS888848-supplement-3.pdf]

## Supplemental Figure S3

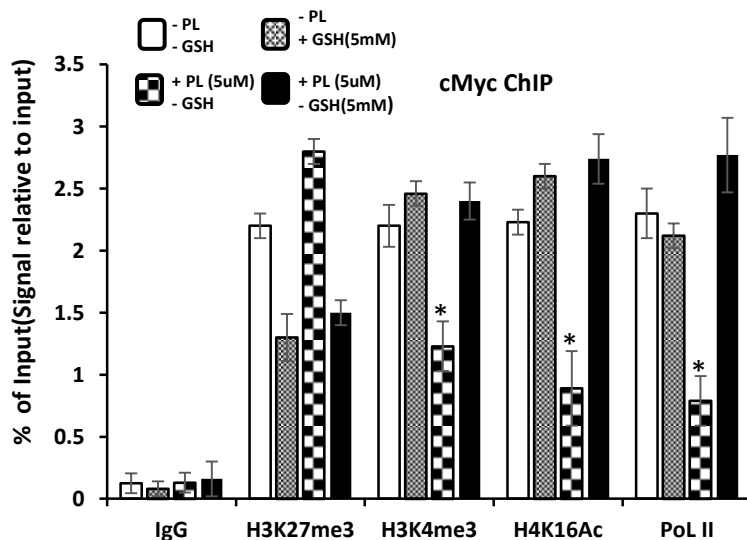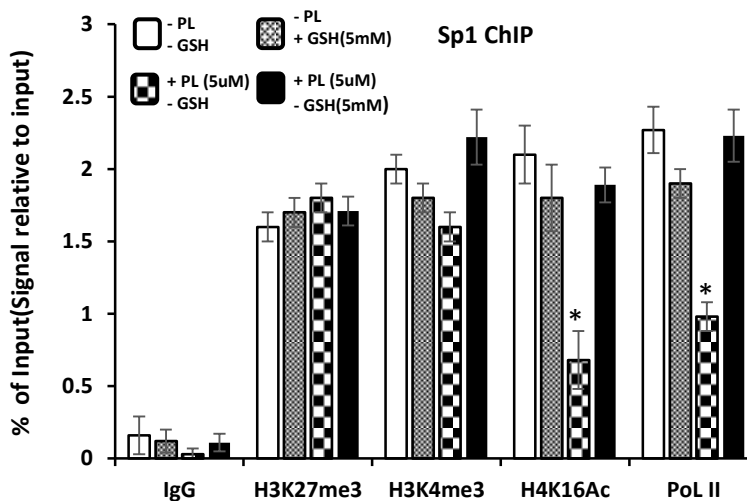

**Supplemental Figure 3.** Quantitative PCR was used to quantitate the relative band intensities of the ChIP assay (results in triplicate) in Figures 6A and 6B. Significantly ( $P < 0.05$ ) decreased pol II bands are indicated (\*).
